# Supplementary material
Source: publisher figshare collection journal article supplement (https://karger.figshare.com/ndownloader/files/8715595)
Supplement: Supplementary file 1 [file 8715595]

Tables:

**Supplementary Table 1:** Prevalence of selected resistance genes detected by DNA microarray among 58 *S. aureus* isolates from CF patients in Austria.

| Gene/Probe1 | Function | Prevalence |
| --- | --- | --- |
| *mecA* | methicillin, oxacillin, β-lactams | 3% |
| *blaZ/I/R* | β-lactams | 86% |
| *ermA/ ermB/ ermC* | macrolides, clindamycin | 17%/ 2%/ 9% |
| *linA* | lincosamides | 2% |
| *msrA, mpbBM* | macrolides | 2% |
| *aacA-aphD* | aminoglycosides | 21% |
| *aadD* | aminoglycosides | 5% |
| *aphA* | aminoglycosides | 2% |
| *sat* | streptothricin | 2% |
| *dfrA* | trimethoprim | 9% |
| *tetK* | tetracycline | 3% |
| *tetEfflux* | tetracycline | 91% |
| *cat* | chloramphenicol | 2% |
| *fosB* | metallothiol transferase | 69% |

1) We did not detect the following resistance genes: *mefA, vatA/B, vga, vgaA/B, far, mupR, tetM, fexA, cfr, vanA/B/Z*

**Supplementary Table 2:** Prevalence of selected virulence genes detected by DNA microarray among 58 *S. aureus* isolates from CF patients in Austria.

| Group | Gene/Probe | Function | Prevalence |
| --- | --- | --- | --- |
| *agr* typing | *agrI* | Accessory gene regulator, type I | 47% |
|  | *agrII* | Accessory gene regulator, type II | 31% |
|  | *agrIII* | Accessory gene regulator, type III | 26% |
|  | *agrIV* | Accessory gene regulator, type IV | 17% |
| Capsule | *cap1* | Capsule type 1 | 0% |
|  | *cap5* | Capsule type 5 | 38% |
|  | *cap8* | Capsule type 8 | 66% |
| Superantigens | *tst* | Toxic shock syndrome toxin | 12% |
|  | *sea* | Enterotoxin A | 17% |
|  | *seb* | Enterotoxin B | 7% |
|  | *sec* | Enterotoxin C | 10% |
|  | *sed* | Enterotoxin D | 14% |
|  | *pvl* | Panton-Valentine-leukocidin | 0% |
|  | *etA* | Exfoliative toxin A | 5% |
|  | *etB* | Exfoliative toxin B | 0% |
|  | *etD* | Exfoliative toxin D | 3% |
|  |  |  |  |
